# Supplementary material for: Profiling Individual Differences in Alcoholic Beverage Preference and Consumption: New Insights from a Large-Scale Study
Source: MDPI journal article supplement (doi:10.3390/foods9081131), 2020-08-17
Supplement: s1 [file s1]

a)

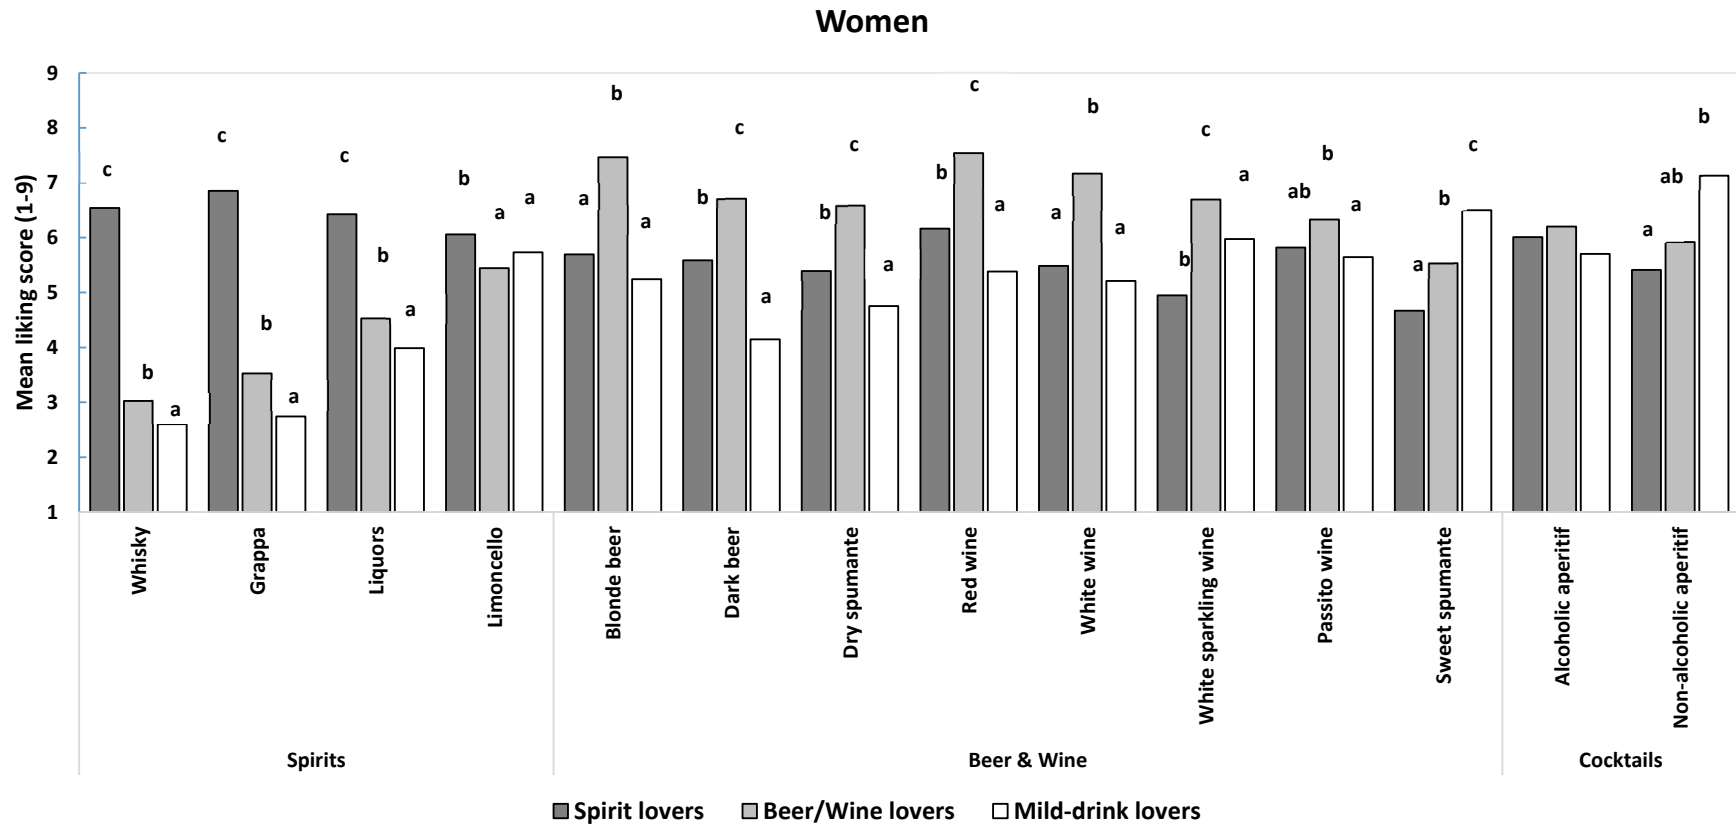

b)

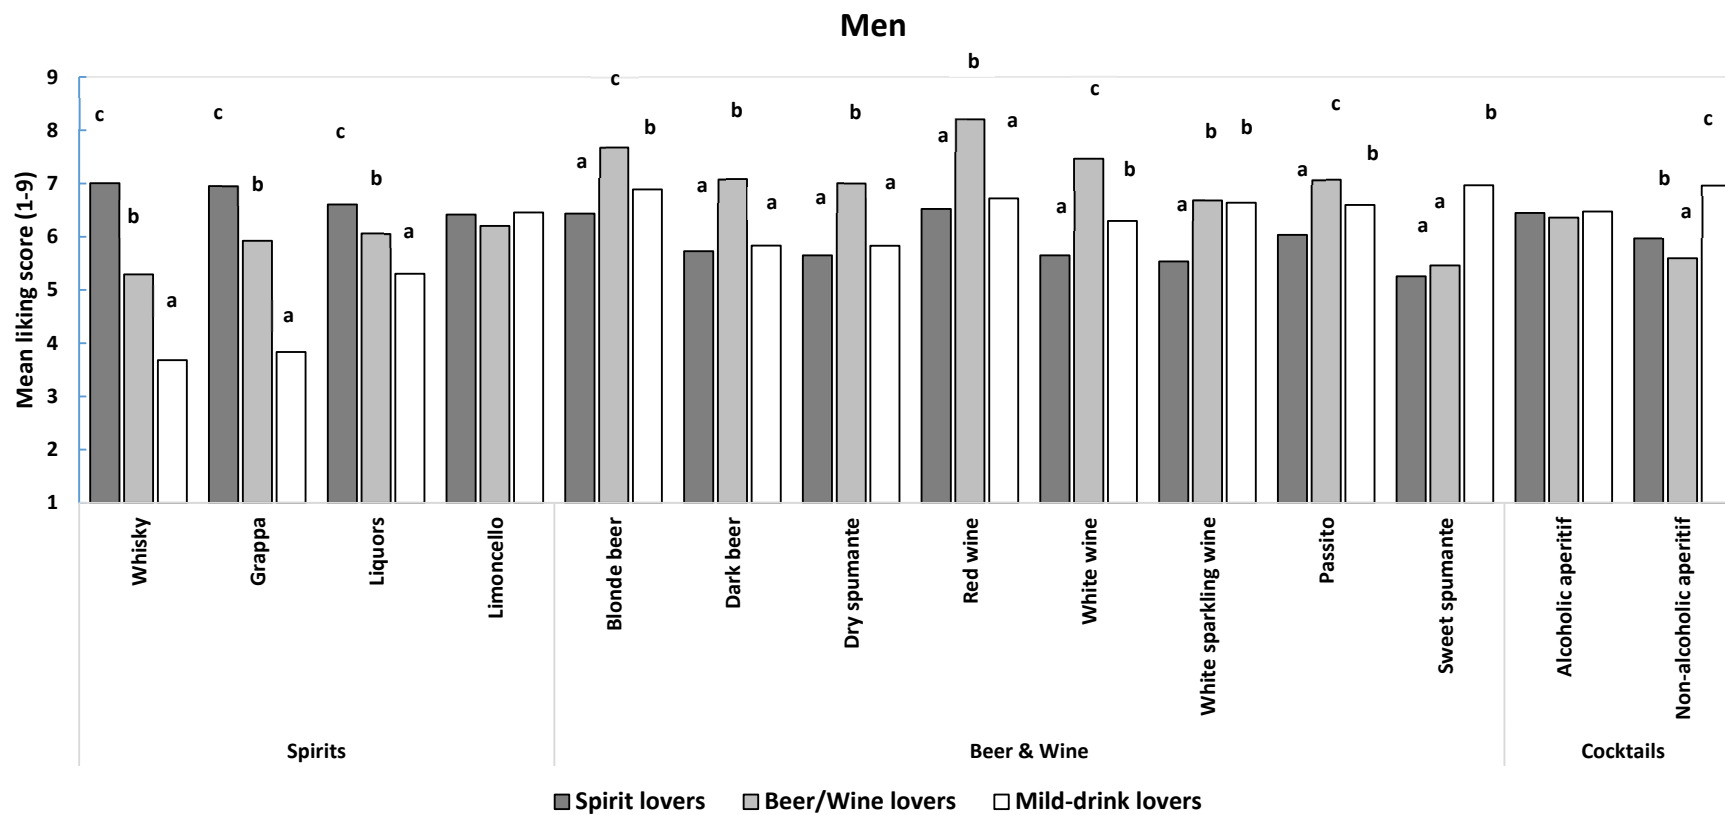

**Figure S1.** Mean liking scores for spirits, beers/wine and cocktails provided by the three consumers clusters (Spirit lovers, Beer/Wine lovers and Mild-drink lovers) of women (a) and men (b). Different letters indicate significant differences by beverage according to Bonferroni post-hoc test
